# Supplementary material for: Ectodomain Architecture Affects Sequence and Functional Evolution of Vertebrate Toll-like Receptors
Source: PubMed Central journal article supplement (PMC4877655; doi:10.1038/srep26705), 2016-05-24
Supplement: srep26705-s1.pdf [file srep26705-s1.pdf]

# Supplementary Information

## Ectodomain Architecture Affects Sequence and Functional Evolution of Vertebrate Toll-like Receptors

Jinlan Wang<sup>1,\*</sup>, Zheng Zhang<sup>2,\*</sup>, Jing Liu<sup>1</sup>, Jing Zhao<sup>1</sup> & Deling Yin<sup>3,4</sup>

<sup>1</sup>Institute of Developmental Biology, School of Life Science, Shandong University, Jinan 250100, China. <sup>2</sup>State

Key Laboratory of Microbial Technology, School of Life Science, Shandong University, Jinan 250100, China.

<sup>3</sup>Department of Pharmacology, School of Pharmaceutical Sciences, Central South University, Changsha 410078,

China. <sup>4</sup>Department of Internal Medicine, College of Medicine, East Tennessee State University, Johnson City, TN 37614, USA.

\*These authors contributed equally to this work.

Correspondence and requests for materials should be addressed to Z.Z. (email: [zhzhang.sdu@gmail.com](mailto:zhzhang.sdu@gmail.com)) or D.Y.

(email: [yin@etsu.edu](mailto:yin@etsu.edu)).

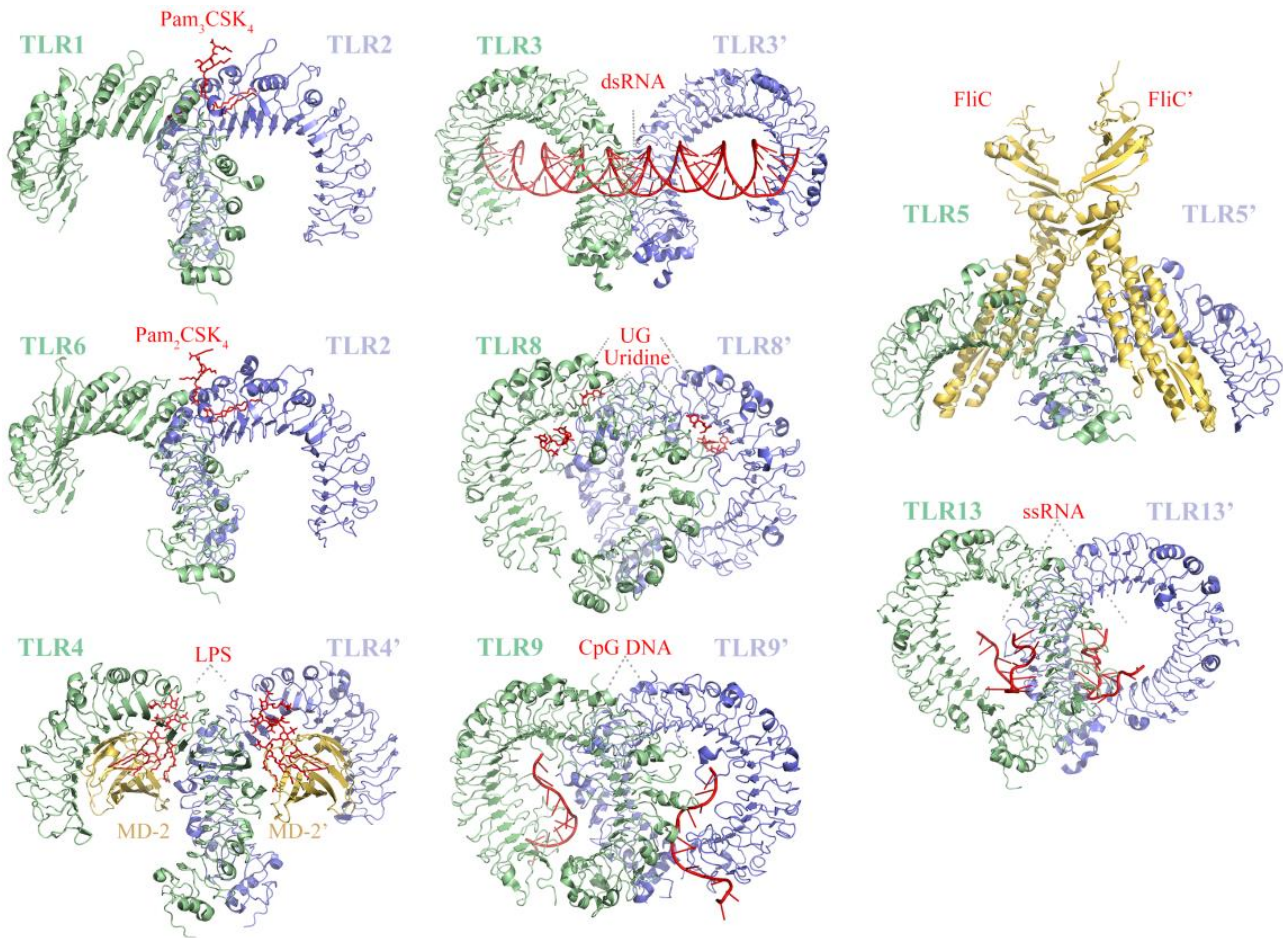

**Supplementary Figure S1. Known crystal structures of TLRs in complex with agonists.** Structural comparison of the ligand-bound dimers of TLR1-TLR2-lipopeptide (PDB code: 2Z7X), TLR2-TLR6-lipopeptide (PDB code: 3A79), TLR3-dsRNA (PDB code: 3CIY), TLR4-MD-2-LPS (PDB code: 3FXI), TLR5-flagellin (PDB code: 3V47), TLR8-ssRNA degradation products (PDB code: 4R08), TLR9-CpG DNA (PDB code: 3WPC), and TLR13-ssRNA (PDB code: 4Z0C). Pam<sub>2</sub>CSK<sub>4</sub>, diacylated lipopeptide; Pam<sub>3</sub>CSK<sub>4</sub>, triacylated lipopeptide; dsRNA, double-stranded RNA; LPS, lipopolysaccharide; Flic, flagellin; Uridine (1st site) and UG (2st site), the degradation products of single-stranded RNA; CpG DNA, unmethylated CpG-containing DNA; ssRNA, single-stranded RNA.

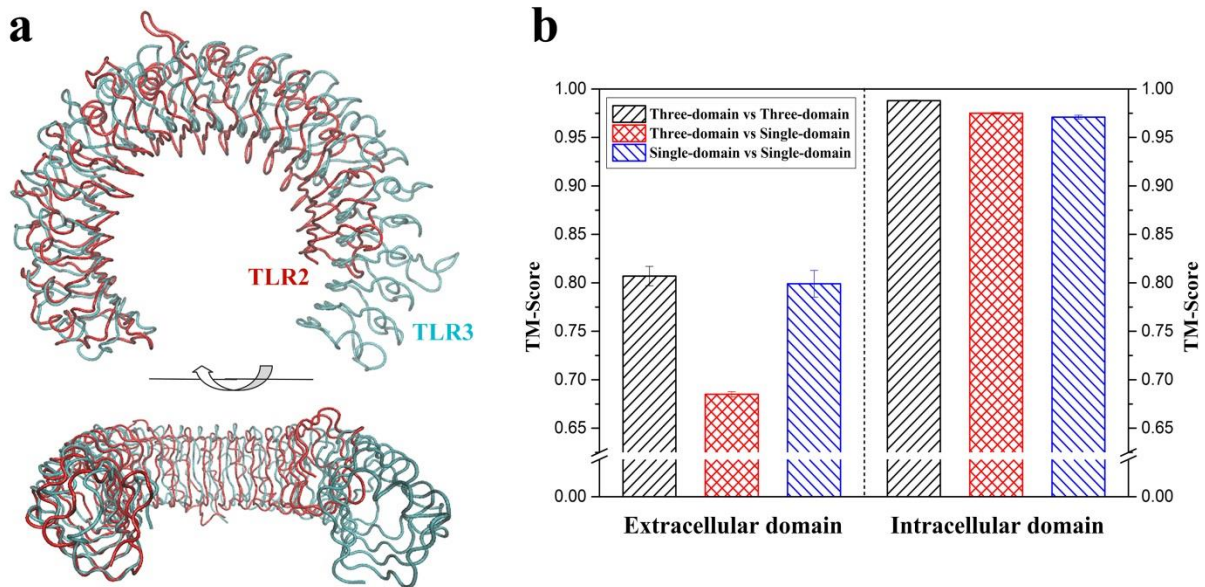

**Supplementary Figure S2. Significant structural differences in the ectodomains between single-domain TLRs and three-domain TLRs.** (a) Superposition of TLR ectodomains. Three-domain TLR2 (PDB code: 2Z7Xa, red) forms a smaller radius than single-domain TLR3 (PDB code: 3CIY, cyan) due to the structural distortions located in its central subdomain. Side view (upper panel) and top view (lower panel). (b) Average structural differences among the modeled TLR structures estimated by TM-align. The sequence information used for modeling is listed in Supplementary Table S1. TM-scores in the columns represent the average degrees of structural differences of three-domain vs. three-domain TLRs (black), three-domain vs. single-domain TLRs (red), and single-domain vs. single-domain TLRs (blue). The structural differences among ectodomains (left) and intracellular domains (right) are displayed. Error bars represent the SEMs.

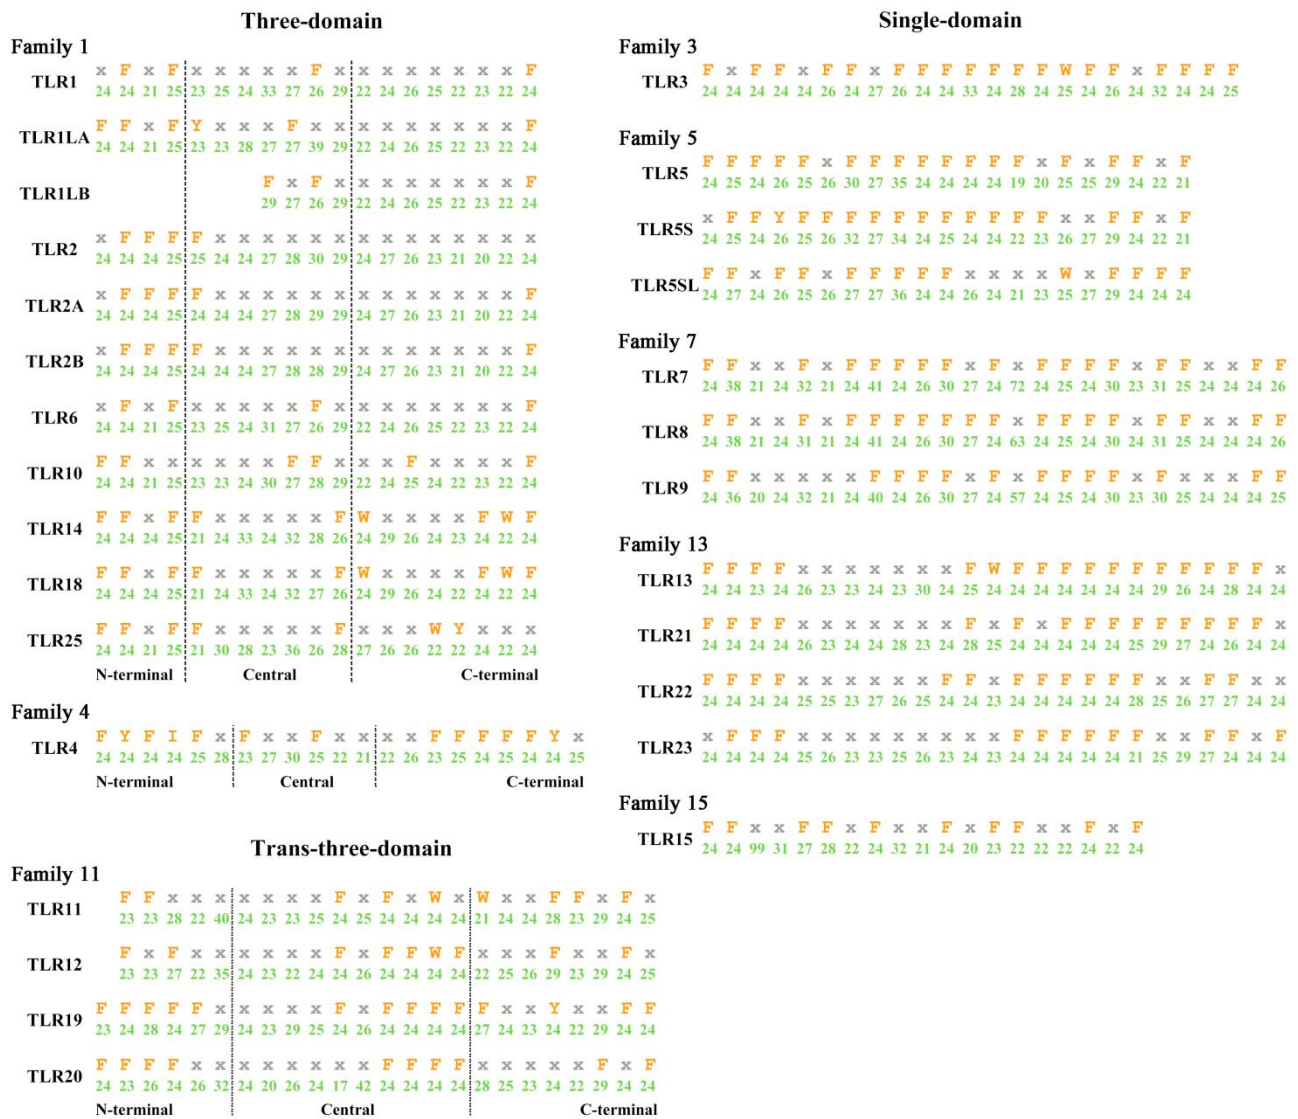

**Supplementary Figure S3. Compositions of phenylalanine spines and the length of each LRR module within the TLR ectodomains.** The ectodomains of 28 types of vertebrate TLRs were analyzed. The representative sequence information for 28 types of vertebrate TLRs and the results of their module predictions are listed in Supplementary Tables S1 and S2, respectively. For each TLR ectodomain, the highest frequency amino acid residue that occurs in the phenylalanine spine positions of each LRR module is successively displayed based on the multiple sequence alignments among homologous sequences. “x” represents any amino acid residue except aromatic amino acids, implying that the phenylalanine spine is lacking in the corresponding LRR module. The length of each LRR module within the ectodomains of representative sequences of 28 types of vertebrate TLRs is displayed together. The family and ectodomain architecture for each type of TLR are labeled. This analysis was not performed for TLR16/24/26/27 because the number of their known full-length sequences was less than 5.

**Supplementary Table S1. Modeling of representative sequences of 28 types of vertebrate TLRs.**

| TLR    | Scientific name              | Accession No.       | Modeled ectodomains |                     |
|--------|------------------------------|---------------------|---------------------|---------------------|
|        |                              |                     | Length (aa)         | Estimated TM-score* |
| TLR1   | <i>Homo sapiens</i>          | ENSG00000174125     | 557                 | 0.66±0.13           |
| TLR1LA | <i>Gallus gallus</i>         | ENSGALG00000017485  | 565                 | 0.65±0.13           |
| TLR1LB | <i>Gallus gallus</i>         | ENSGALG00000027093  | 411                 | 0.61±0.14           |
| TLR2   | <i>Homo sapiens</i>          | ENSG00000137462     | 567                 | 0.88±0.07           |
| TLR2A  | <i>Gallus gallus</i>         | XM_003641158        | 571                 | 0.81±0.09           |
| TLR2B  | <i>Gallus gallus</i>         | AB046533            | 562                 | 0.85±0.08           |
| TLR3   | <i>Homo sapiens</i>          | ENSG00000164342     | 680                 | 0.90±0.06           |
| TLR4   | <i>Homo sapiens</i>          | ENSG00000136869     | 610                 | 0.99±0.04           |
| TLR5   | <i>Homo sapiens</i>          | ENSG00000187554     | 623                 | 0.91±0.06           |
| TLR5S  | <i>Takifugu rubripes</i>     | XM_003971921        | 620                 | 0.90±0.06           |
| TLR5SL | <i>Xenopus tropicalis</i>    | ENSXETG00000030446  | 635                 | 0.71±0.12           |
| TLR6   | <i>Homo sapiens</i>          | ENSG00000174130     | 555                 | 0.67±0.13           |
| TLR7   | <i>Homo sapiens</i>          | ENSG00000196664     | 816                 | 0.78±0.09           |
| TLR8   | <i>Homo sapiens</i>          | ENSG00000101916     | 799                 | 0.92±0.06           |
| TLR9   | <i>Homo sapiens</i>          | ENSG00000239732     | 793                 | 0.77±0.10           |
| TLR10  | <i>Homo sapiens</i>          | ENSG00000174123     | 557                 | 0.66±0.13           |
| TLR11  | <i>Mus musculus</i>          | ENSMUSG000000051969 | 688                 | 0.66±0.13           |
| TLR12  | <i>Mus musculus</i>          | ENSMUSG000000062545 | 688                 | 0.73±0.11           |
| TLR13  | <i>Mus musculus</i>          | ENSMUSG000000033777 | 715                 | 0.92±0.06           |
| TLR14  | <i>Anolis carolinensis</i>   | XM_003230485        | 575                 | 0.69±0.12           |
| TLR15  | <i>Gallus gallus</i>         | NM_001037835        | 631                 | 0.72±0.11           |
| TLR18  | <i>Danio rerio</i>           | ENSDARG000000040249 | 576                 | 0.65±0.13           |
| TLR19  | <i>Ictalurus punctatus</i>   | HQ677722            | 714                 | 0.68±0.12           |
| TLR20  | <i>Ictalurus punctatus</i>   | HQ677723            | 715                 | 0.71±0.11           |
| TLR21  | <i>Gallus gallus</i>         | ENSGALG00000000774  | 714                 | 0.82±0.08           |
| TLR22  | <i>Danio rerio</i>           | NM_001128675        | 720                 | 0.78±0.10           |
| TLR23  | <i>Takifugu rubripes</i>     | AC156435            | 708                 | 0.89±0.07           |
| TLR25  | <i>Oreochromis niloticus</i> | ENSONIG00000014149  | 576                 | 0.68±0.12           |

\* Estimated TM-scores are used to measure the accuracy of structure modeling. A TM-score >0.5 indicates a model with the correct topology.

**Supplementary Table S2. Module predictions for representative sequences of 28 types of vertebrate TLRs.**

| <b>TLR*</b>   | <b>1</b> | <b>1LA</b> | <b>1LB</b> | <b>2</b> | <b>2A</b> | <b>2B</b> | <b>3</b> | <b>4</b> | <b>5</b> |
|---------------|----------|------------|------------|----------|-----------|-----------|----------|----------|----------|
| <b>Signal</b> | 1-24     | 1-27       | 1-29       | 1-20     | 1-25      | 1-22      | 1-22     | 1-23     | 1-20     |
| <b>LRRNT</b>  | 25-46    | 28-49      | 30-76      | 21-53    | 26-64     | 23-53     | 23-52    | 24-55    | 21-47    |
| <b>LRR1</b>   | 47-70    | 50-73      | 77-105     | 54-77    | 65-88     | 54-77     | 53-76    | 56-79    | 48-71    |
| <b>LRR2</b>   | 71-94    | 74-97      | 106-132    | 78-101   | 89-112    | 78-101    | 77-100   | 80-103   | 72-96    |
| <b>LRR3</b>   | 95-115   | 98-118     | 133-158    | 102-125  | 113-136   | 102-125   | 101-124  | 104-127  | 97-120   |
| <b>LRR4</b>   | 116-140  | 119-143    | 159-187    | 126-150  | 137-161   | 126-150   | 125-148  | 128-151  | 121-146  |
| <b>LRR5</b>   | 141-163  | 144-166    | 188-209    | 151-175  | 162-185   | 151-174   | 149-172  | 152-176  | 147-171  |
| <b>LRR6</b>   | 164-188  | 167-189    | 210-233    | 176-199  | 186-209   | 175-198   | 173-198  | 177-204  | 172-197  |
| <b>LRR7</b>   | 189-212  | 190-217    | 234-259    | 200-223  | 210-233   | 199-222   | 199-222  | 205-227  | 198-227  |
| <b>LRR8</b>   | 213-245  | 218-244    | 260-284    | 224-250  | 234-260   | 223-249   | 223-249  | 228-254  | 228-254  |
| <b>LRR9</b>   | 246-272  | 245-271    | 285-306    | 251-278  | 261-288   | 250-277   | 250-275  | 255-284  | 255-289  |
| <b>LRR10</b>  | 273-298  | 272-310    | 307-329    | 279-308  | 289-317   | 278-305   | 276-299  | 285-309  | 290-313  |
| <b>LRR11</b>  | 299-327  | 311-339    | 330-351    | 309-337  | 318-346   | 306-334   | 300-323  | 310-331  | 314-337  |
| <b>LRR12</b>  | 328-349  | 340-361    | 352-375    | 338-361  | 347-370   | 335-358   | 324-356  | 332-352  | 338-361  |
| <b>LRR13</b>  | 350-373  | 362-385    |            | 362-388  | 371-397   | 359-385   | 357-380  | 353-374  | 362-385  |
| <b>LRR14</b>  | 374-399  | 386-411    |            | 389-414  | 398-423   | 386-411   | 381-408  | 375-400  | 386-404  |
| <b>LRR15</b>  | 400-424  | 412-436    |            | 415-437  | 424-446   | 412-434   | 409-432  | 401-423  | 405-424  |
| <b>LRR16</b>  | 425-446  | 437-458    |            | 438-458  | 447-467   | 435-455   | 433-457  | 424-448  | 425-449  |
| <b>LRR17</b>  | 447-469  | 459-481    |            | 459-478  | 468-487   | 456-475   | 458-481  | 449-472  | 450-474  |
| <b>LRR18</b>  | 470-491  | 482-503    |            | 479-500  | 488-509   | 476-497   | 482-507  | 473-497  | 475-503  |
| <b>LRR19</b>  | 492-515  | 504-527    |            | 501-524  | 510-533   | 498-521   | 508-531  | 498-521  | 504-527  |
| <b>LRR20</b>  |          |            |            |          |           |           | 532-563  | 522-545  | 528-549  |
| <b>LRR21</b>  |          |            |            |          |           |           | 564-587  | 546-570  | 550-570  |
| <b>LRR22</b>  |          |            |            |          |           |           | 588-611  |          |          |
| <b>LRR23</b>  |          |            |            |          |           |           | 612-636  |          |          |
| <b>LRR24</b>  |          |            |            |          |           |           |          |          |          |
| <b>LRR25</b>  |          |            |            |          |           |           |          |          |          |
| <b>LRRCT</b>  | 516-581  | 528-592    | 376-440    | 525-587  | 534-596   | 522-584   | 637-702  | 571-633  | 571-643  |
| <b>TM</b>     | 582-604  | 593-615    | 441-463    | 588-610  | 597-619   | 585-607   | 703-725  | 634-656  | 644-666  |
| <b>TIR</b>    | 605-786  | 616-818    | 464-652    | 611-784  | 620-793   | 608-781   | 726-904  | 657-839  | 667-858  |

**Supplementary Table S2. Cont.**

| <b>TLR*</b>   | <b>5S</b> | <b>5SL</b> | <b>6</b> | <b>7</b> | <b>8</b> | <b>9</b> | <b>10</b> | <b>11</b> | <b>12</b> |
|---------------|-----------|------------|----------|----------|----------|----------|-----------|-----------|-----------|
| <b>Signal</b> | 1-21      | 1-17       | 1-31     | 1-26     | 1-26     | 1-25     | 1-19      | 1-30      | 1-21      |
| <b>LRRNT</b>  | 22-46     | 18-55      | 32-53    | 27-66    | 27-64    | 26-64    | 20-49     | 31-82     | 22-70     |
| <b>LRR1</b>   | 47-70     | 56-79      | 54-77    | 67-90    | 65-88    | 65-88    | 50-73     | 83-105    | 71-93     |
| <b>LRR2</b>   | 71-95     | 80-106     | 78-101   | 91-128   | 89-126   | 89-124   | 74-97     | 106-128   | 94-116    |
| <b>LRR3</b>   | 96-119    | 107-130    | 102-122  | 129-149  | 127-147  | 125-144  | 98-118    | 129-156   | 117-143   |
| <b>LRR4</b>   | 120-145   | 131-156    | 123-147  | 150-173  | 148-171  | 145-168  | 119-143   | 157-178   | 144-165   |
| <b>LRR5</b>   | 146-170   | 157-181    | 148-170  | 174-205  | 172-202  | 169-200  | 144-166   | 179-218   | 166-200   |
| <b>LRR6</b>   | 171-196   | 182-207    | 171-195  | 206-226  | 203-223  | 201-221  | 167-189   | 219-242   | 201-224   |
| <b>LRR7</b>   | 197-228   | 208-234    | 196-219  | 227-250  | 224-247  | 222-245  | 190-213   | 243-265   | 225-247   |
| <b>LRR8</b>   | 229-255   | 235-261    | 220-250  | 251-291  | 248-288  | 246-285  | 214-243   | 266-288   | 248-269   |
| <b>LRR9</b>   | 256-289   | 262-297    | 251-277  | 292-315  | 289-312  | 286-309  | 244-270   | 289-313   | 270-293   |
| <b>LRR10</b>  | 290-313   | 298-321    | 278-303  | 316-341  | 313-338  | 310-335  | 271-298   | 314-337   | 294-317   |
| <b>LRR11</b>  | 314-338   | 322-345    | 304-332  | 342-371  | 339-368  | 336-365  | 299-327   | 338-362   | 318-343   |
| <b>LRR12</b>  | 339-362   | 346-371    | 333-354  | 372-398  | 369-395  | 366-392  | 328-349   | 363-386   | 344-367   |
| <b>LRR13</b>  | 363-386   | 372-395    | 355-378  | 399-422  | 396-419  | 393-416  | 350-373   | 387-410   | 368-391   |
| <b>LRR14</b>  | 387-408   | 396-416    | 379-404  | 423-494  | 420-482  | 417-473  | 374-398   | 411-434   | 392-415   |
| <b>LRR15</b>  | 409-431   | 417-439    | 405-429  | 495-518  | 483-506  | 474-497  | 399-422   | 435-458   | 416-439   |
| <b>LRR16</b>  | 432-457   | 440-464    | 430-451  | 519-543  | 507-531  | 498-522  | 423-444   | 459-479   | 440-461   |
| <b>LRR17</b>  | 458-484   | 465-491    | 452-474  | 544-567  | 532-555  | 523-546  | 445-467   | 480-503   | 462-486   |
| <b>LRR18</b>  | 485-513   | 492-520    | 475-496  | 568-597  | 556-585  | 547-576  | 468-489   | 504-527   | 487-512   |
| <b>LRR19</b>  | 514-537   | 521-544    | 497-520  | 598-620  | 586-609  | 577-599  | 490-513   | 528-555   | 513-541   |
| <b>LRR20</b>  | 538-559   | 545-568    |          | 621-651  | 610-640  | 600-629  |           | 556-578   | 542-564   |
| <b>LRR21</b>  | 560-580   | 569-592    |          | 652-676  | 641-665  | 630-654  |           | 579-607   | 565-593   |
| <b>LRR22</b>  |           |            |          | 677-700  | 666-689  | 655-678  |           | 608-631   | 594-617   |
| <b>LRR23</b>  |           |            |          | 701-724  | 690-713  | 679-702  |           | 632-656   | 618-642   |
| <b>LRR24</b>  |           |            |          | 725-748  | 714-737  | 703-726  |           |           |           |
| <b>LRR25</b>  |           |            |          | 749-774  | 738-763  | 727-751  |           |           |           |
| <b>LRRCT</b>  | 581-641   | 593-652    | 521-586  | 775-842  | 764-825  | 752-818  | 514-576   | 657-718   | 643-709   |
| <b>TM</b>     |           |            | 587-609  | 843-865  | 826-848  | 819-839  | 577-599   | 719-741   | 710-730   |
| <b>TIR</b>    |           |            | 610-796  | 866-1049 | 849-1041 | 840-1032 | 600-811   | 742-926   | 731-906   |

**Supplementary Table S2. Cont.**

| <b>TLR*</b>   | <b>13</b> | <b>14</b> | <b>15</b> | <b>18</b> | <b>19</b> | <b>20</b> | <b>21</b> | <b>22</b> | <b>23</b> | <b>25</b> |
|---------------|-----------|-----------|-----------|-----------|-----------|-----------|-----------|-----------|-----------|-----------|
| <b>Signal</b> | 1-68      | 1-25      | 1-22      | 1-22      | 1-31      | 1-18      | 1-38      | 1-22      | 1-21      | 1-27      |
| <b>LRRNT</b>  | 69-104    | 26-56     | 23-55     | 23-53     | 32-79     | 19-64     | 39-74     | 23-59     | 22-57     | 28-63     |
| <b>LRR1</b>   | 105-128   | 57-80     | 56-79     | 54-77     | 80-102    | 65-88     | 75-98     | 60-83     | 58-81     | 64-87     |
| <b>LRR2</b>   | 129-152   | 81-104    | 80-103    | 78-101    | 103-126   | 89-111    | 99-122    | 84-107    | 82-105    | 88-111    |
| <b>LRR3</b>   | 153-175   | 105-128   | 104-202   | 102-125   | 127-154   | 112-137   | 123-146   | 108-131   | 106-129   | 112-132   |
| <b>LRR4</b>   | 176-199   | 129-153   | 203-233   | 126-150   | 155-178   | 138-161   | 147-170   | 132-155   | 130-153   | 133-157   |
| <b>LRR5</b>   | 200-225   | 154-174   | 234-260   | 151-171   | 179-205   | 162-187   | 171-196   | 156-180   | 154-178   | 158-178   |
| <b>LRR6</b>   | 226-248   | 175-198   | 261-288   | 172-195   | 206-234   | 188-219   | 197-219   | 181-205   | 179-204   | 179-208   |
| <b>LRR7</b>   | 249-271   | 199-231   | 289-310   | 196-228   | 235-258   | 220-243   | 220-243   | 206-228   | 205-227   | 209-236   |
| <b>LRR8</b>   | 272-295   | 232-255   | 311-334   | 229-252   | 259-281   | 244-263   | 244-267   | 229-255   | 228-250   | 237-259   |
| <b>LRR9</b>   | 296-318   | 256-287   | 335-366   | 253-284   | 282-310   | 264-289   | 268-295   | 256-281   | 251-275   | 260-295   |
| <b>LRR10</b>  | 319-348   | 288-315   | 367-387   | 285-311   | 311-335   | 290-313   | 296-318   | 282-306   | 276-301   | 296-321   |
| <b>LRR11</b>  | 349-372   | 316-341   | 388-411   | 312-337   | 336-359   | 314-330   | 319-342   | 307-330   | 302-324   | 322-349   |
| <b>LRR12</b>  | 373-397   | 342-365   | 412-431   | 338-361   | 360-385   | 331-372   | 343-370   | 331-354   | 325-348   | 350-376   |
| <b>LRR13</b>  | 398-421   | 366-394   | 432-454   | 362-390   | 386-409   | 373-396   | 371-395   | 355-377   | 349-371   | 377-402   |
| <b>LRR14</b>  | 422-445   | 395-420   | 455-476   | 391-416   | 410-433   | 397-420   | 396-419   | 378-401   | 372-395   | 403-428   |
| <b>LRR15</b>  | 446-469   | 421-444   | 477-498   | 417-440   | 434-457   | 421-444   | 420-443   | 402-425   | 396-419   | 429-450   |
| <b>LRR16</b>  | 470-493   | 445-467   | 499-520   | 441-462   | 458-481   | 445-468   | 444-467   | 426-449   | 420-443   | 451-472   |
| <b>LRR17</b>  | 494-517   | 468-491   | 521-544   | 463-486   | 482-508   | 469-496   | 468-491   | 450-473   | 444-467   | 473-496   |
| <b>LRR18</b>  | 518-541   | 492-513   | 545-566   | 487-508   | 509-532   | 497-521   | 492-515   | 474-497   | 468-491   | 497-518   |
| <b>LRR19</b>  | 542-565   | 514-537   | 567-590   | 509-532   | 533-555   | 522-544   | 516-540   | 498-525   | 492-512   | 519-542   |
| <b>LRR20</b>  | 566-594   |           |           |           | 556-579   | 545-568   | 541-569   | 526-550   | 513-537   |           |
| <b>LRR21</b>  | 595-620   |           |           |           | 580-601   | 569-590   | 570-596   | 551-576   | 538-566   |           |
| <b>LRR22</b>  | 621-644   |           |           |           | 602-630   | 591-619   | 597-620   | 577-603   | 567-593   |           |
| <b>LRR23</b>  | 645-672   |           |           |           | 631-654   | 620-643   | 621-646   | 604-630   | 594-617   |           |
| <b>LRR24</b>  | 673-696   |           |           |           | 655-678   | 644-667   | 647-670   | 631-654   | 618-641   |           |
| <b>LRR25</b>  | 697-720   |           |           |           |           |           | 671-694   | 655-678   | 642-665   |           |
| <b>LRRCT</b>  | 721-783   | 538-600   | 591-653   | 533-598   | 679-745   | 668-733   | 695-752   | 679-742   | 666-729   | 543-603   |
| <b>TM</b>     | 784-804   | 601-622   | 654-676   | 599-621   | 746-763   | 734-753   | 753-775   | 743-765   | 730-753   | 604-626   |
| <b>TIR</b>    | 805-991   | 623-836   | 677-868   | 622-854   | 764-955   | 754-933   | 776-972   | 766-947   | 754-941   | 627-827   |

\* See Supplementary Table S1 for information regarding the sequences used for module predictions. “Signal” represents the signal peptide. “TM” represents the transmembrane region. “TIR” represents the whole intracellular domain.



**Supplementary Table S3. Typical ligands of vertebrate TLRs.**

| TLR                                                             | Family        | Localization                 | Dimerization                | Ligand                         | Origin of ligand                                      | Ref.     |
|-----------------------------------------------------------------|---------------|------------------------------|-----------------------------|--------------------------------|-------------------------------------------------------|----------|
| TLR1/TLR2                                                       | TD family 1   | Cell surface                 | Heterodimer                 | Lipopeptides,<br>lipomannan    | Bacteria                                              | (1-4)    |
| TLR6/TLR2                                                       | TD family 1   | Cell surface                 | Heterodimer                 | Lipopeptides                   | Bacteria,<br>mycoplasma                               | (5-7)    |
| TLR10/TLR2                                                      | TD family 1   | Cell surface                 | Heterodimer                 | Lipopeptides                   | Bacteria                                              | (8)      |
| TLR1LA/TLR2A,<br>TLR1LA/TLR2B,<br>TLR1LB/TLR2A,<br>TLR1LB/TLR2B | TD family 1   | Cell surface                 | Heterodimer                 | Lipopeptides,<br>peptidoglycan | Bacteria,<br>mycoplasma                               | (9, 10)  |
| TLR4                                                            | TD family 1   | Cell surface                 | Homodimer                   | LPS                            | Bacteria                                              | (11, 12) |
| TLR3                                                            | SD family 3   | Endosome                     | Homodimer                   | dsRNA                          | Virus                                                 | (13)     |
| TLR5                                                            | SD family 5   | Cell surface                 | Homodimer                   | Flagellin                      | Flagellated bacteria                                  | (14-18)  |
| TLR5S                                                           | SD family 5   | Soluble                      |                             | Flagellin                      | Flagellated bacteria                                  | (19, 20) |
| TLR7                                                            | SD family 7   | Endosome                     | Homodimer                   | ssRNA                          | Virus                                                 | (21-23)  |
| TLR8                                                            | SD family 7   | Endosome                     | Homodimer                   | ssRNA                          | Virus                                                 | (23)     |
| TLR9                                                            | SD family 7   | Endosome                     | Homodimer                   | CpG DNA                        | Virus, bacteria                                       | (24-26)  |
| TLR13                                                           | SD family 13  | Endosome                     |                             | ssRNA                          | Virus, bacteria                                       | (27-30)  |
| TLR21                                                           | SD family 13  | Endosome                     |                             | CpG DNA                        | Virus, bacteria                                       | (26, 31) |
| TLR22                                                           | SD family 13  | Cell surface                 |                             | dsRNA                          | Virus                                                 | (32)     |
| TLR15                                                           | SD family 15  | Cell surface                 |                             | Proteases                      | Bacteria, fungi                                       | (33)     |
| TLR11/TLR12,<br>TLR11, TLR12                                    | TTD family 11 | Endosome                     | Homodimer or<br>heterodimer | Profilin,<br>flagellin         | <i>Toxoplasma gondii</i> ,<br><i>Salmonella Typhi</i> | (34-37)  |
| TLR19, TLR20                                                    | TTD family 11 | Intracellular<br>compartment |                             | unknown                        | Protozoan parasite                                    | (38, 39) |

## References

1. Aliprantis AO, *et al.* (1999) Cell activation and apoptosis by bacterial lipoproteins through toll-like receptor-2. *Science* 285(5428):736-739.
2. Takeuchi O, *et al.* (2002) Cutting edge: role of Toll-like receptor 1 in mediating immune response to microbial lipoproteins. *Journal of immunology* 169(1):10-14.
3. Quesniaux VJ, *et al.* (2004) Toll-like receptor 2 (TLR2)-dependent-positive and TLR2-independent-negative regulation of proinflammatory cytokines by mycobacterial lipomannans. *Journal of immunology* 172(7):4425-4434.
4. Vignal C, *et al.* (2003) Lipomannans, but not lipoarabinomannans, purified from *Mycobacterium chelonae* and *Mycobacterium kansasii* induce TNF-alpha and IL-8 secretion by a CD14-toll-like receptor 2-dependent mechanism. *Journal of immunology* 171(4):2014-2023.
5. Takeuchi O, *et al.* (2001) Discrimination of bacterial lipoproteins by Toll-like receptor 6. *International immunology* 13(7):933-940.
6. Bulut Y, Faure E, Thomas L, Equils O, & Arditi M (2001) Cooperation of Toll-like receptor 2 and 6 for cellular activation by soluble tuberculosis factor and *Borrelia burgdorferi* outer surface protein A lipoprotein: role of Toll-interacting protein and IL-1 receptor signaling molecules in Toll-like receptor 2 signaling. *Journal of immunology* 167(2):987-994.
7. Buwitt-Beckmann U, *et al.* (2005) Toll-like receptor 6-independent signaling by diacylated lipopeptides. *European journal of immunology* 35(1):282-289.
8. Guan Y, *et al.* (2010) Human TLRs 10 and 1 share common mechanisms of innate immune sensing but not signaling. *Journal of immunology* 184(9):5094-5103.
9. Higuchi M, *et al.* (2008) Combinational recognition of bacterial lipoproteins and peptidoglycan by chicken Toll-like receptor 2 subfamily. *Developmental and comparative immunology* 32(2):147-155.
10. Keestra AM, de Zoete MR, van Aubel RA, & van Putten JP (2007) The central leucine-rich repeat region of chicken TLR16 dictates unique ligand specificity and species-specific interaction with TLR2. *Journal of immunology* 178(11):7110-7119.
11. Shimazu R, *et al.* (1999) MD-2, a molecule that confers lipopolysaccharide responsiveness on Toll-like receptor 4. *The Journal of experimental medicine* 189(11):1777-1782.
12. Poltorak A, *et al.* (1998) Defective LPS signaling in C3H/HeJ and C57BL/10ScCr mice: mutations in *Tlr4* gene. *Science* 282(5396):2085-2088.
13. Alexopoulou L, Holt AC, Medzhitov R, & Flavell RA (2001) Recognition of double-stranded RNA and activation of NF-kappaB by Toll-like receptor 3. *Nature* 413(6857):732-738.
14. Hayashi F, *et al.* (2001) The innate immune response to bacterial flagellin is mediated by Toll-like receptor 5. *Nature* 410(6832):1099-1103.
15. Eaves-Pyles TD, Wong HR, Odoms K, & Pyles RB (2001) *Salmonella* flagellin-dependent proinflammatory responses are localized to the conserved amino and carboxyl regions of the protein. *Journal of immunology* 167(12):7009-7016.
16. Mizel SB, West AP, & Hantgan RR (2003) Identification of a sequence in human toll-like receptor 5 required for the binding of Gram-negative flagellin. *The Journal of biological chemistry* 278(26):23624-23629.
17. Iqbal M, *et al.* (2005) Identification and functional characterization of chicken toll-like receptor 5 reveals a fundamental role in the biology of infection with *Salmonella enterica* serovar typhimurium. *Infection and immunity* 73(4):2344-2350.
18. Stockhammer OW, Zakrzewska A, Hegedus Z, Spaink HP, & Meijer AH (2009) Transcriptome profiling and functional analyses of the zebrafish embryonic innate immune response to *Salmonella* infection. *Journal of immunology* 182(9):5641-5653.
19. Tsujita T, *et al.* (2004) Sensing bacterial flagellin by membrane and soluble orthologs of Toll-like receptor 5 in rainbow trout (*Onchorhynchus mikiss*). *The Journal of biological chemistry* 279(47):48588-48597.
20. Munoz I, Sepulcre MP, Meseguer J, & Mulero V (2013) Molecular cloning, phylogenetic analysis and functional characterization of soluble Toll-like receptor 5 in gilthead seabream, *Sparus aurata*. *Fish & shellfish immunology* 35(1):36-45.
21. Lund JM, *et al.* (2004) Recognition of single-stranded RNA viruses by Toll-like receptor 7. *Proceedings of the National*

*Academy of Sciences of the United States of America* 101(15):5598-5603.

22. Diebold SS, Kaisho T, Hemmi H, Akira S, & Reis e Sousa C (2004) Innate antiviral responses by means of TLR7-mediated recognition of single-stranded RNA. *Science* 303(5663):1529-1531.
23. Heil F, *et al.* (2004) Species-specific recognition of single-stranded RNA via toll-like receptor 7 and 8. *Science* 303(5663):1526-1529.
24. Rutz M, *et al.* (2004) Toll-like receptor 9 binds single-stranded CpG-DNA in a sequence- and pH-dependent manner. *European journal of immunology* 34(9):2541-2550.
25. Hemmi H, *et al.* (2000) A Toll-like receptor recognizes bacterial DNA. *Nature* 408(6813):740-745.
26. Yeh DW, *et al.* (2013) Toll-like receptor 9 and 21 have different ligand recognition profiles and cooperatively mediate activity of CpG-oligodeoxynucleotides in zebrafish. *Proceedings of the National Academy of Sciences of the United States of America* 110(51):20711-20716.
27. Li XD & Chen ZJ (2012) Sequence specific detection of bacterial 23S ribosomal RNA by TLR13. *eLife* 1:e00102.
28. Shi Z, *et al.* (2011) A novel Toll-like receptor that recognizes vesicular stomatitis virus. *The Journal of biological chemistry* 286(6):4517-4524.
29. Oldenburg M, *et al.* (2012) TLR13 recognizes bacterial 23S rRNA devoid of erythromycin resistance-forming modification. *Science* 337(6098):1111-1115.
30. Hidmark A, von Saint Paul A, & Dalpke AH (2012) Cutting edge: TLR13 is a receptor for bacterial RNA. *Journal of immunology* 189(6):2717-2721.
31. Kestra AM, de Zoete MR, Bouwman LI, & van Putten JP (2010) Chicken TLR21 is an innate CpG DNA receptor distinct from mammalian TLR9. *Journal of immunology* 185(1):460-467.
32. Matsuo A, *et al.* (2008) Teleost TLR22 recognizes RNA duplex to induce IFN and protect cells from birnaviruses. *Journal of immunology* 181(5):3474-3485.
33. de Zoete MR, Bouwman LI, Kestra AM, & van Putten JP (2011) Cleavage and activation of a Toll-like receptor by microbial proteases. *Proceedings of the National Academy of Sciences of the United States of America* 108(12):4968-4973.
34. Yarovinsky F, *et al.* (2005) TLR11 activation of dendritic cells by a protozoan profilin-like protein. *Science* 308(5728):1626-1629.
35. Zhang D, *et al.* (2004) A toll-like receptor that prevents infection by uropathogenic bacteria. *Science* 303(5663):1522-1526.
36. Mathur R, *et al.* (2012) A mouse model of Salmonella typhi infection. *Cell* 151(3):590-602.
37. Koblansky AA, *et al.* (2013) Recognition of profilin by Toll-like receptor 12 is critical for host resistance to Toxoplasma gondii. *Immunity* 38(1):119-130.
38. Pietretti D, *et al.* (2014) Identification and functional characterization of nonmammalian Toll-like receptor 20. *Immunogenetics* 66(2):123-141.
39. Lee PT, *et al.* (2014) Identification and characterisation of TLR18-21 genes in Atlantic salmon (*Salmo salar*). *Fish & shellfish immunology* 41(2):549-559.

**Supplementary Table S4. Distribution of TLR genes in 39 vertebrate genomes.**

| No. | Common name              | Scientific name                   | Taxon             | Ensembl assembly | TLR gene copies* |    |     |
|-----|--------------------------|-----------------------------------|-------------------|------------------|------------------|----|-----|
|     |                          |                                   |                   |                  | TD               | SD | TTD |
| 1   | Human                    | <i>Homo sapiens</i>               | Mammalia          | GRCh38.p2        | 5                | 5  | 0   |
| 2   | Chimpanzee               | <i>Pan troglodytes</i>            | Mammalia          | CHIMP2.1.4       | 5                | 4  | 0   |
| 3   | Gorilla                  | <i>Gorilla gorilla gorilla</i>    | Mammalia          | gorGor3.1        | 6                | 5  | 0   |
| 4   | Gibbon                   | <i>Nomascus leucogenys</i>        | Mammalia          | Nleu1.0          | 4                | 5  | 0   |
| 5   | Macaque                  | <i>Macaca mulatta</i>             | Mammalia          | MMUL 1.0         | 5                | 5  | 0   |
| 6   | Marmoset                 | <i>Callithrix jacchus</i>         | Mammalia          | C_jacchus3.2.1   | 5                | 5  | 0   |
| 7   | Bushbaby                 | <i>Otolemur garnettii</i>         | Mammalia          | OtoGar3          | 4                | 5  | 0   |
| 8   | Mouse                    | <i>Mus musculus</i>               | Mammalia          | GRCm38.p3        | 4                | 6  | 2   |
| 9   | Rat                      | <i>Rattus norvegicus</i>          | Mammalia          | Rnor_5.0         | 5                | 5  | 2   |
| 10  | Squirrel                 | <i>Ictidomys tridecemlineatus</i> | Mammalia          | spetri2          | 5                | 6  | 1   |
| 11  | Guinea Pig               | <i>Cavia porcellus</i>            | Mammalia          | cavPor3          | 5                | 4  | 0   |
| 12  | Cow                      | <i>Bos taurus</i>                 | Mammalia          | UMD3.1           | 5                | 4  | 0   |
| 13  | Sheep                    | <i>Ovis aries</i>                 | Mammalia          | Oar_v3.1         | 5                | 5  | 0   |
| 14  | Pig                      | <i>Sus scrofa</i>                 | Mammalia          | Sscrofa10.2      | 5                | 5  | 0   |
| 15  | Horse                    | <i>Equus caballus</i>             | Mammalia          | Equ Cab 2        | 5                | 4  | 2   |
| 16  | Microbat                 | <i>Myotis lucifugus</i>           | Mammalia          | Myoluc2.0        | 4                | 6  | 1   |
| 17  | Dog                      | <i>Canis lupus familiaris</i>     | Mammalia          | CanFam3.1        | 5                | 5  | 0   |
| 18  | Ferret                   | <i>Mustela putorius furo</i>      | Mammalia          | MusPutFur1.0     | 4                | 5  | 0   |
| 19  | Panda                    | <i>Ailuropoda melanoleuca</i>     | Mammalia          | ailMel1          | 5                | 5  | 0   |
| 20  | Elephant                 | <i>Loxodonta africana</i>         | Mammalia          | Loxafr3.0        | 5                | 5  | 2   |
| 21  | Armadillo                | <i>Dasypus novemcinctus</i>       | Mammalia          | Dasnov3.0        | 5                | 4  | 2   |
| 22  | Tasmanian devil          | <i>Sarcophilus harrisii</i>       | Mammalia          | Devil_ref v7.0   | 4                | 6  | 0   |
| 23  | Platypus                 | <i>Ornithorhynchus anatinus</i>   | Mammalia          | OANA5            | 4                | 4  | 1   |
| 24  | Chicken                  | <i>Gallus gallus</i>              | Aves              | Galgal4          | 5                | 5  | 0   |
| 25  | Turkey                   | <i>Meleagris gallopavo</i>        | Aves              | Turkey_2.01      | 5                | 5  | 0   |
| 26  | Duck                     | <i>Anas platyrhynchos</i>         | Aves              | BGI_duck_1.0     | 5                | 4  | 0   |
| 27  | Zebra Finch              | <i>Taeniopygia guttata</i>        | Aves              | taeGut3.2.4      | 5                | 4  | 0   |
| 28  | Flycatcher               | <i>Ficedula albicollis</i>        | Aves              | FicAlb_1.4       | 5                | 5  | 0   |
| 29  | Anole lizard             | <i>Anolis carolinensis</i>        | Reptiles          | AnoCar2.0        | 6                | 7  | 0   |
| 30  | Chinese softshell turtle | <i>Pelodiscus sinensis</i>        | Reptiles          | PelSin_1.0       | 4                | 10 | 0   |
| 31  | Xenopus                  | <i>Xenopus tropicalis</i>         | Amphibia          | JGI 4.2          | 9                | 10 | 1   |
| 32  | Coelacanth               | <i>Latimeria chalumnae</i>        | Coelacanthimorpha | LatCha1          | 4                | 11 | 0   |
| 33  | Spotted gar              | <i>Lepisosteus oculatus</i>       | Actinopterygii    | LepOcu1          | 6                | 8  | 0   |
| 34  | Zebrafish                | <i>Danio rerio</i>                | Actinopterygii    | Zv9              | 6                | 10 | 4   |
| 35  | Cave fish                | <i>Astyanax mexicanus</i>         | Actinopterygii    | AstMex102        | 3                | 11 | 3   |
| 36  | Fugu                     | <i>Takifugu rubripes</i>          | Actinopterygii    | FUGU 4.0         | 3                | 9  | 0   |
| 37  | Medaka                   | <i>Oryzias latipes</i>            | Actinopterygii    | HdrR             | 4                | 7  | 0   |
| 38  | Platyfish                | <i>Xiphophorus maculatus</i>      | Actinopterygii    | Xipmac4.4.2      | 3                | 13 | 0   |
| 39  | Tilapia                  | <i>Oreochromis niloticus</i>      | Actinopterygii    | Orenil1.0        | 3                | 9  | 0   |

\* Three-domain TLRs (TD), single-domain TLRs (SD), and trans-three-domain TLRs (TTD).

**Supplementary Data S1. Information for 1428 TLRs in vertebrates.** Columns: (A) The accession numbers of the coding sequences for TLRs; (B) Scientific names of species from which the TLRs originated; (C) The taxonomic designations of species from which the TLRs originated; (D) TLR types; (E) TLR families; (F) The architectures of TLR ectodomains; (G) The coding sequences of the TLRs.
